# Supplementary material for: Incidence of Infusion Reactions and Clinical Effectiveness of Intravenous Golimumab Versus Infliximab in Patients with Rheumatoid Arthritis: The Real-World AWARE Study
Source: PubMed Central journal article supplement — Rheumatol Ther. 2021 Aug 20;8(4):1551–63. doi: 10.1007/s40744-021-00354-4 (PMC8572298; doi:10.1007/s40744-021-00354-4), 2021-08-20
Supplement: 40744_2021_354_MOESM1_ESM.pdf [file 40744_2021_354_MOESM1_ESM.pdf]

Supplemental material for Incidence of Infusion Reactions and Clinical Effectiveness of Intravenous Golimumab versus Infliximab in Patients with Rheumatoid Arthritis: The Real-World AWARE Study

| Supplemental Table 1: Shifts in Imputed Categorical CDAI of biologic-naïve golimumab-IV and infliximab patients |                          |                               |               |                |                  |                              |               |                |                  |
|-----------------------------------------------------------------------------------------------------------------|--------------------------|-------------------------------|---------------|----------------|------------------|------------------------------|---------------|----------------|------------------|
|                                                                                                                 |                          | Biologic-naïve golimumab-IV   |               |                |                  | Biologic-naïve infliximab    |               |                |                  |
|                                                                                                                 |                          | Baseline CDAI Category        |               |                |                  | Baseline CDAI Category       |               |                |                  |
| Visit                                                                                                           | Follow-up CDAI Category  | LDA/<br>Remission*<br>(n =16) | MDA<br>(n=55) | HDA<br>(n=144) | Total<br>(n=215) | LDA/<br>Remission*<br>(n=20) | MDA<br>(n=54) | HDA<br>(n=148) | Total<br>(n=222) |
| Month 3                                                                                                         | Remission (CDAI ≤ 2.8)   | 2 (12.5)                      | 5 (9.1)       | 2 (1.4)        | 9 (4.2)          | 3 (15.0)                     | 5 (9.3)       | 2 (1.4)        | 10 (4.5)         |
| Month 3                                                                                                         | LDA (CDAI >2.8 and ≤ 10) | 10 (62.5)                     | 18 (32.7)     | 17 (11.8)      | 45 (20.9)        | 13 (65.0)                    | 16 (29.6)     | 14 (9.5)       | 43 (19.4)        |
| Month 3                                                                                                         | MDA (CDAI > 10 and ≤ 22) | 4 (25.0)                      | 27 (49.1)     | 38 (26.4)      | 69 (32.1)        | 2 (10.0)                     | 30 (55.6)     | 36 (24.3)      | 68 (30.6)        |
| Month 3                                                                                                         | HDA (CDAI > 22)          | 0 (0.0)                       | 5 (9.1)       | 87 (60.4)      | 92 (42.8)        | 2 (10.0)                     | 3 (5.6)       | 96 (64.9)      | 101 (45.5)       |
| Month 6                                                                                                         | Remission (CDAI ≤ 2.8)   | 6 (37.5)                      | 5 (9.1)       | 6 (4.2)        | 17 (7.9)         | 4 (20.0)                     | 8 (14.8)      | 4 (2.7)        | 16 (7.2)         |
| Month 6                                                                                                         | LDA (CDAI >2.8 and ≤ 10) | 6 (37.5)                      | 28 (50.9)     | 31 (21.5)      | 65 (30.2)        | 12 (60.0)                    | 23 (42.6)     | 23 (15.5)      | 58 (26.1)        |
| Month 6                                                                                                         | MDA (CDAI > 10 and ≤ 22) | 3 (18.8)                      | 20 (36.4)     | 30 (20.8)      | 53 (24.7)        | 3 (15.0)                     | 21 (38.9)     | 41 (27.7)      | 65 (29.3)        |
| Month 6                                                                                                         | HDA (CDAI > 22)          | 1 (6.3)                       | 2 (3.6)       | 77 (53.5)      | 80 (37.2)        | 1 (5.0)                      | 2 (3.7)       | 80 (54.1)      | 83 (37.4)        |
| Month 12                                                                                                        | Remission (CDAI ≤ 2.8)   | 4 (25.0)                      | 6 (10.9)      | 8 (5.6)        | 18 (8.4)         | 7 (35.0)                     | 10 (18.5)     | 5 (3.4)        | 22 (9.9)         |
| Month 12                                                                                                        | LDA (CDAI >2.8 and ≤ 10) | 9 (56.3)                      | 27 (49.1)     | 30 (20.8)      | 66 (30.7)        | 7 (35.0)                     | 19 (35.2)     | 28 (18.9)      | 54 (24.3)        |
| Month 12                                                                                                        | MDA (CDAI > 10 and ≤ 22) | 2 (12.5)                      | 21 (38.2)     | 32 (22.2)      | 55 (25.6)        | 5 (25.0)                     | 15 (27.8)     | 43 (29.1)      | 63 (28.4)        |
| Month 12                                                                                                        | HDA (CDAI > 22)          | 1 (6.3)                       | 1 (1.8)       | 74 (51.4)      | 76 (35.3)        | 1 (5.0)                      | 10 (18.5)     | 72 (48.6)      | 83 (37.4)        |

Data shown as n (%).

\* Includes both Remission and LDA categories (CDAI ≤ 10)

CDAI clinical disease activity index, HDA high disease activity, IV intravenous, LDA low disease activity, MDA moderate disease activity

Supplemental Table 2: Prescribed dose (mg/kg) by infusion visit in biologic-naïve and biologic-experienced patients who received golimumab-IV, infliximab with dose escalation, or infliximab without dose escalation (patients with imputed CDAI).

|                  | Biologic-naïve Patients |                            |                               |                     | Biologic-experienced Patients |                            |                               |                     |
|------------------|-------------------------|----------------------------|-------------------------------|---------------------|-------------------------------|----------------------------|-------------------------------|---------------------|
|                  | Golimumab-IV            | Dose-escalated infliximab* | Non-dose-escalated infliximab | Combined infliximab | Golimumab-IV                  | Dose-escalated infliximab* | Non-dose-escalated infliximab | Combined infliximab |
| Infusion visit 1 |                         |                            |                               |                     |                               |                            |                               |                     |
| Patients, N      | 215                     | 172                        | 50                            | 222                 | 398                           | 234                        | 53                            | 287                 |
| Mean dose ± SD   | 2.00 ± 0.00             | 3.25 ± 0.62                | 3.36 ± 0.67                   | 3.28 ± 0.63         | 2.00 ± 0.06                   | 3.29 ± 0.79                | 3.35 ± 0.76                   | 3.30 ± 0.78         |
| Infusion visit 2 |                         |                            |                               |                     |                               |                            |                               |                     |
| Patients, N      | 213                     | 172                        | 49                            | 221                 | 395                           | 234                        | 50                            | 284                 |
| Mean dose ± SD   | 2.00 ± 0.00             | 3.28 ± 0.64                | 3.33 ± 0.62                   | 3.29 ± 0.64         | 2.00 ± 0.01                   | 3.35 ± 0.84                | 3.36 ± 0.78                   | 3.35 ± 0.83         |
| Infusion visit 3 |                         |                            |                               |                     |                               |                            |                               |                     |
| Patients, N      | 206                     | 171                        | 41                            | 212                 | 374                           | 232                        | 47                            | 279                 |
| Mean dose ± SD   | 2.00 ± 0.00             | 3.41 ± 0.78                | 3.33 ± 0.61                   | 3.39 ± 0.75         | 2.00 ± 0.01                   | 3.60 ± 1.17                | 3.31 ± 0.69                   | 3.55 ± 1.11         |
| Infusion visit 4 |                         |                            |                               |                     |                               |                            |                               |                     |
| Patients, N      | 180                     | 170                        | 37                            | 207                 | 331                           | 227                        | 35                            | 262                 |
| Mean dose ± SD   | 2.00 ± 0.00             | 3.91 ± 1.20                | 3.29 ± 0.66                   | 3.80 ± 1.15         | 2.00 ± 0.02                   | 4.03 ± 1.40                | 3.32 ± 0.72                   | 3.94 ± 1.35         |
| Infusion visit 5 |                         |                            |                               |                     |                               |                            |                               |                     |
| Patients, N      | 163                     | 159                        | 26                            | 185                 | 300                           | 216                        | 22                            | 238                 |
| Mean dose ± SD   | 2.00 ± 0.00             | 4.29 ± 1.38                | 3.37 ± 0.69                   | 4.16 ± 1.35         | 2.01 ± 0.07                   | 4.54 ± 1.74                | 3.45 ± 1.54                   | 4.44 ± 1.75         |
| Infusion visit 6 |                         |                            |                               |                     |                               |                            |                               |                     |
| Patients, N      | 142                     | 151                        | 22                            | 173                 | 263                           | 202                        | 16                            | 218                 |
| Mean dose ± SD   | 2.00 ± 0.00             | 4.67 ± 1.64                | 3.35 ± 0.65                   | 4.50 ± 1.61         | 2.00 ± 0.02                   | 4.85 ± 1.87                | 3.18 ± 0.55                   | 4.73 ± 1.86         |
| Infusion visit 7 |                         |                            |                               |                     |                               |                            |                               |                     |
| Patients, N      | 132                     | 147                        | 19                            | 166                 | 243                           | 181                        | 15                            | 196                 |
| Mean dose ± SD   | 2.00 ± 0.00             | 4.80 ± 1.66                | 3.41 ± 0.69                   | 4.64 ± 1.64         | 2.00 ± 0.03                   | 5.13 ± 2.00                | 3.09 ± 0.29                   | 4.97 ± 2.0          |
| Infusion visit 8 |                         |                            |                               |                     |                               |                            |                               |                     |
| Patients, N      | 119                     | 135                        | 18                            | 153                 | 224                           | 160                        | 12                            | 172                 |
| Mean dose ± SD   | 2.00 ± 0.00             | 4.91 ± 1.71                | 3.43 ± 0.70                   | 4.73 ± 1.69         | 2.00 ± 0.03                   | 5.38 ± 2.14                | 3.25 ± 0.62                   | 5.23 ± 2.14         |
| Infusion visit 9 |                         |                            |                               |                     |                               |                            |                               |                     |
| Patients, N      | 107                     | 127                        | 18                            | 145                 | 206                           | 140                        | 8                             | 148                 |
| Mean dose ± SD   | 2.00 ± 0.00             | 5.14 ± 1.75                | 3.31 ± 0.58                   | 4.91 ± 1.76         | 2.00 ± 0.03                   | 5.48 ± 2.09                | 3.25 ± 0.71                   | 5.36 ± 2.10         |

\*Included patients who had at least one administration consistent with dose escalation.

IV intravenous, SD standard deviation

Supplemental Table 3. Mean CDAI scores and mean change from baseline (observed data) through month 12 for golimumab-IV, dose-escalated infliximab and non-dose-escalated infliximab among patients who were biologic-naïve or biologic-experienced

|                         | Observed Biologic-naïve Patients |                            |                               |                     | Observed Biologic-experienced Patients |                            |                               |                     |
|-------------------------|----------------------------------|----------------------------|-------------------------------|---------------------|----------------------------------------|----------------------------|-------------------------------|---------------------|
|                         | Golimumab-IV                     | Dose-escalated infliximab* | Non-dose-escalated infliximab | Combined infliximab | Golimumab-IV                           | Dose-escalated infliximab* | Non-dose-escalated infliximab | Combined infliximab |
| <b>Baseline</b>         |                                  |                            |                               |                     |                                        |                            |                               |                     |
| Patients, N             | 110                              | 106                        | 32                            | 138                 | 209                                    | 123                        | 21                            | 144                 |
| Mean ± SD               | 29.1 ± 14.4                      | 31.9 ± 14.3                | 22.4 ± 12.9                   | 29.7 ± 14.5         | 30.8 ± 15.3                            | 33.7 ± 15.8                | 25.7 ± 10.8                   | 32.6 ± 15.4         |
| <b>Month 6</b>          |                                  |                            |                               |                     |                                        |                            |                               |                     |
| Score, N                | 98                               | 92                         | 27                            | 119                 | 196                                    | 107                        | 18                            | 125                 |
| Mean ± SD               | 12.9 ± 12.6                      | 18.2 ± 14.9                | 11.4 ± 11.0                   | 16.7 ± 14.3         | 18.4 ± 13.5                            | 22.6 ± 15.1                | 11.8 ± 7.2                    | 21.1 ± 14.7         |
| Change from baseline, N | 97                               | 92                         | 27                            | 119                 | 196                                    | 107                        | 18                            | 125                 |
| Mean ± SD               | -15.7 ± 13.4                     | -13.4 ± 13.9               | -10.2 ± 9.6                   | -12.7 ± 13.0        | -12.3 ± 15.2                           | -10.3 ± 15.1               | -14.1 ± 11.8                  | -10.8 ± 14.7        |
| <b>Month 12</b>         |                                  |                            |                               |                     |                                        |                            |                               |                     |
| Score, N                | 111                              | 106                        | 32                            | 138                 | 209                                    | 123                        | 21                            | 144                 |
| Mean ± SD               | 13.6 ± 12.4                      | 18.4 ± 14.2)               | 11.3 ± 11.8                   | 16.8 ± 14.0         | 17.2 ± 14.1                            | 21.4 ± 15.4                | 15.1 ± 12.7                   | 20.5 ± 15.2         |
| Change from baseline, N | 110                              | 106                        | 32                            | 138                 | 209                                    | 123                        | 21                            | 144                 |
| Mean ± SD               | -15.5 ± 13.8                     | -13.5 ± 14.3               | -11.1 ± 15.2                  | -12.9 ± 14.5        | -13.6 ± 14.4                           | -12.3 ± 15.4               | -10.6 ± 14.1                  | -12.1 ± 15.1        |

\*Included patients who had at least one administration consistent with dose escalation.

CDAI clinical disease activity index, IV intravenous, SD standard deviation
